# Supplementary material
Source: publisher site journal article supplement (https://www.spandidos-publications.com/3678/downloadSupplementary)
Supplement: Supplementary file 1 [file downloadSupplementary]

## Sheet: Down_Genes
#term ID	term description	observed gene count	background gene count	strength	false discovery rate	matching proteins in your network (IDs)	matching proteins in your network (labels)
hsa05200	Pathways in cancer	13	515	97	1.56e-05	9606.ENSP00000227507,9606.ENSP00000258149,9606.ENSP00000258411,9606.ENSP00000261254,9606.ENSP00000309572,9606.ENSP00000315299,9606.ENSP00000330382,9606.ENSP00000332973,9606.ENSP00000361943,9606.ENSP00000362608,9606.ENSP00000365692,9606.ENSP00000379140,9606.ENSP00000410294	CCND1,MDM2,WNT10A,CCND2,TERT,CALML3,PDGFB,SMAD3,HEYL,PIM1,PIM2,CXCL12,FGFR2
hsa04060	Cytokine-cytokine receptor interaction	9	263	11	0.000319	9606.ENSP00000227752,9606.ENSP00000276431,9606.ENSP00000296140,9606.ENSP00000296861,9606.ENSP00000305651,9606.ENSP00000330382,9606.ENSP00000351059,9606.ENSP00000362795,9606.ENSP00000379140	IL10RA,TNFRSF10B,CCR1,TNFRSF21,CXCL10,PDGFB,CX3CR1,CXCR3,CXCL12
hsa05162	Measles	7	133	129	0.000469	9606.ENSP00000227507,9606.ENSP00000261254,9606.ENSP00000276431,9606.ENSP00000363089,9606.ENSP00000381601,9606.ENSP00000388001,9606.ENSP00000481570	CCND1,CCND2,TNFRSF10B,TLR4,MX1,OAS1,TNFAIP3
hsa05206	MicroRNAs in cancer	7	149	124	0.000737	9606.ENSP00000227507,9606.ENSP00000258149,9606.ENSP00000261254,9606.ENSP00000330382,9606.ENSP00000346697,9606.ENSP00000356113,9606.ENSP00000362608	CCND1,MDM2,CCND2,PDGFB,BMF,SLC45A3,PIM1
hsa05164	Influenza A	7	168	119	0.00129	9606.ENSP00000276431,9606.ENSP00000305651,9606.ENSP00000363089,9606.ENSP00000381588,9606.ENSP00000381601,9606.ENSP00000388001,9606.ENSP00000468348	TNFRSF10B,CXCL10,TLR4,TMPRSS2,MX1,OAS1,MAP2K6
hsa04218	Cellular senescence	6	156	115	12	9606.ENSP00000227507,9606.ENSP00000258149,9606.ENSP00000261254,9606.ENSP00000315299,9606.ENSP00000332973,9606.ENSP00000468348	CCND1,MDM2,CCND2,CALML3,SMAD3,MAP2K6
hsa05202	Transcriptional misregulation in cancer	6	169	112	16	9606.ENSP00000258149,9606.ENSP00000261254,9606.ENSP00000356113,9606.ENSP00000360493,9606.ENSP00000362361,9606.ENSP00000381588	MDM2,CCND2,SLC45A3,RUNX2,CDK9,TMPRSS2
hsa05215	Prostate cancer	5	97	128	16	9606.ENSP00000227507,9606.ENSP00000258149,9606.ENSP00000330382,9606.ENSP00000381588,9606.ENSP00000410294	CCND1,MDM2,PDGFB,TMPRSS2,FGFR2
hsa04062	Chemokine signaling pathway	6	181	109	18	9606.ENSP00000296140,9606.ENSP00000305651,9606.ENSP00000351059,9606.ENSP00000362795,9606.ENSP00000378217,9606.ENSP00000379140	CCR1,CXCL10,CX3CR1,CXCR3,PRKCD,CXCL12
hsa04110	Cell cycle	5	123	118	36	9606.ENSP00000227507,9606.ENSP00000258149,9606.ENSP00000261254,9606.ENSP00000307288,9606.ENSP00000332973	CCND1,MDM2,CCND2,MCM7,SMAD3
hsa05165	Human papillomavirus infection	7	317	91	36	9606.ENSP00000227507,9606.ENSP00000258149,9606.ENSP00000258411,9606.ENSP00000261254,9606.ENSP00000309572,9606.ENSP00000361943,9606.ENSP00000381601	CCND1,MDM2,WNT10A,CCND2,TERT,HEYL,MX1
hsa04115	p53 signaling pathway	4	68	134	53	9606.ENSP00000227507,9606.ENSP00000258149,9606.ENSP00000261254,9606.ENSP00000276431	CCND1,MDM2,CCND2,TNFRSF10B
hsa04151	PI3K-Akt signaling pathway	7	348	87	53	9606.ENSP00000227507,9606.ENSP00000258149,9606.ENSP00000261254,9606.ENSP00000330382,9606.ENSP00000351209,9606.ENSP00000363089,9606.ENSP00000410294	CCND1,MDM2,CCND2,PDGFB,EPHA2,TLR4,FGFR2
hsa05214	Glioma	4	68	134	53	9606.ENSP00000227507,9606.ENSP00000258149,9606.ENSP00000315299,9606.ENSP00000330382	CCND1,MDM2,CALML3,PDGFB
hsa05226	Gastric cancer	5	147	11	55	9606.ENSP00000227507,9606.ENSP00000258411,9606.ENSP00000309572,9606.ENSP00000332973,9606.ENSP00000410294	CCND1,WNT10A,TERT,SMAD3,FGFR2
hsa04390	Hippo signaling pathway	5	152	108	59	9606.ENSP00000227507,9606.ENSP00000258411,9606.ENSP00000261254,9606.ENSP00000262158,9606.ENSP00000332973	CCND1,WNT10A,CCND2,SMAD7,SMAD3
hsa05166	HTLV-I infection	6	250	95	59	9606.ENSP00000227507,9606.ENSP00000258411,9606.ENSP00000261254,9606.ENSP00000309572,9606.ENSP00000330382,9606.ENSP00000332973	CCND1,WNT10A,CCND2,TERT,PDGFB,SMAD3
hsa04630	Jak-STAT signaling pathway	5	160	106	67	9606.ENSP00000227507,9606.ENSP00000227752,9606.ENSP00000261254,9606.ENSP00000330382,9606.ENSP00000362608	CCND1,IL10RA,CCND2,PDGFB,PIM1
hsa04621	NOD-like receptor signaling pathway	5	166	105	76	9606.ENSP00000363089,9606.ENSP00000378217,9606.ENSP00000388001,9606.ENSP00000462521,9606.ENSP00000481570	TLR4,PRKCD,OAS1,TXNIP,TNFAIP3
hsa04010	MAPK signaling pathway	6	293	88	11	9606.ENSP00000262138,9606.ENSP00000330382,9606.ENSP00000351209,9606.ENSP00000405963,9606.ENSP00000410294,9606.ENSP00000468348	CACNG4,PDGFB,EPHA2,RASGRF1,FGFR2,MAP2K6
hsa04933	AGE-RAGE signaling pathway in diabetic complications	4	98	118	11	9606.ENSP00000227507,9606.ENSP00000332973,9606.ENSP00000362608,9606.ENSP00000378217	CCND1,SMAD3,PIM1,PRKCD
hsa05167	Kaposi's sarcoma-associated herpesvirus infection	5	183	10	11	9606.ENSP00000227507,9606.ENSP00000296140,9606.ENSP00000315299,9606.ENSP00000330382,9606.ENSP00000468348	CCND1,CCR1,CALML3,PDGFB,MAP2K6
hsa04510	Focal adhesion	5	197	97	13	9606.ENSP00000222693,9606.ENSP00000227507,9606.ENSP00000261254,9606.ENSP00000330382,9606.ENSP00000405963	CAV2,CCND1,CCND2,PDGFB,RASGRF1
hsa05205	Proteoglycans in cancer	5	195	98	13	9606.ENSP00000222693,9606.ENSP00000227507,9606.ENSP00000258149,9606.ENSP00000258411,9606.ENSP00000363089	CAV2,CCND1,MDM2,WNT10A,TLR4
hsa05219	Bladder cancer	3	41	143	13	9606.ENSP00000227507,9606.ENSP00000258149,9606.ENSP00000379038	CCND1,MDM2,TYMP
hsa04015	Rap1 signaling pathway	5	203	96	14	9606.ENSP00000315299,9606.ENSP00000330382,9606.ENSP00000351209,9606.ENSP00000410294,9606.ENSP00000468348	CALML3,PDGFB,EPHA2,FGFR2,MAP2K6
hsa04340	Hedgehog signaling pathway	3	46	138	17	9606.ENSP00000227507,9606.ENSP00000261254,9606.ENSP00000385808	CCND1,CCND2,KIF3A
hsa04014	Ras signaling pathway	5	228	91	22	9606.ENSP00000315299,9606.ENSP00000330382,9606.ENSP00000351209,9606.ENSP00000405963,9606.ENSP00000410294	CALML3,PDGFB,EPHA2,RASGRF1,FGFR2
hsa04068	FoxO signaling pathway	4	130	106	24	9606.ENSP00000227507,9606.ENSP00000258149,9606.ENSP00000261254,9606.ENSP00000332973	CCND1,MDM2,CCND2,SMAD3
hsa05418	Fluid shear stress and atherosclerosis	4	133	105	25	9606.ENSP00000222693,9606.ENSP00000315299,9606.ENSP00000330382,9606.ENSP00000468348	CAV2,CALML3,PDGFB,MAP2K6
hsa04310	Wnt signaling pathway	4	143	101	32	9606.ENSP00000227507,9606.ENSP00000258411,9606.ENSP00000261254,9606.ENSP00000332973	CCND1,WNT10A,CCND2,SMAD3
hsa05221	Acute myeloid leukemia	3	66	122	40	9606.ENSP00000227507,9606.ENSP00000362608,9606.ENSP00000365692	CCND1,PIM1,PIM2
hsa05218	Melanoma	3	72	119	48	9606.ENSP00000227507,9606.ENSP00000258149,9606.ENSP00000330382	CCND1,MDM2,PDGFB
hsa05225	Hepatocellular carcinoma	4	163	96	48	9606.ENSP00000227507,9606.ENSP00000258411,9606.ENSP00000309572,9606.ENSP00000332973	CCND1,WNT10A,TERT,SMAD3
hsa05133	Pertussis	3	74	118	50	9606.ENSP00000268638,9606.ENSP00000315299,9606.ENSP00000363089	IRF8,CALML3,TLR4
hsa05220	Chronic myeloid leukemia	3	76	116	52	9606.ENSP00000227507,9606.ENSP00000258149,9606.ENSP00000332973	CCND1,MDM2,SMAD3
hsa04912	GnRH signaling pathway	3	88	11	76	9606.ENSP00000315299,9606.ENSP00000378217,9606.ENSP00000468348	CALML3,PRKCD,MAP2K6
hsa05169	Epstein-Barr virus infection	4	194	88	78	9606.ENSP00000227752,9606.ENSP00000258149,9606.ENSP00000468348,9606.ENSP00000481570	IL10RA,MDM2,MAP2K6,TNFAIP3
hsa04064	NF-kappa B signaling pathway	3	93	108	82	9606.ENSP00000363089,9606.ENSP00000379140,9606.ENSP00000481570	TLR4,CXCL12,TNFAIP3
hsa04750	Inflammatory mediator regulation of TRP channels	3	92	108	82	9606.ENSP00000315299,9606.ENSP00000378217,9606.ENSP00000468348	CALML3,PRKCD,MAP2K6
hsa01522	Endocrine resistance	3	95	107	85	9606.ENSP00000227507,9606.ENSP00000258149,9606.ENSP00000353820	CCND1,MDM2,CYP2D6
hsa04620	Toll-like receptor signaling pathway	3	102	104	101	9606.ENSP00000305651,9606.ENSP00000363089,9606.ENSP00000468348	CXCL10,TLR4,MAP2K6
hsa04668	TNF signaling pathway	3	108	101	116	9606.ENSP00000305651,9606.ENSP00000468348,9606.ENSP00000481570	CXCL10,MAP2K6,TNFAIP3
hsa05145	Toxoplasmosis	3	109	101	116	9606.ENSP00000227752,9606.ENSP00000363089,9606.ENSP00000468348	IL10RA,TLR4,MAP2K6
hsa04144	Endocytosis	4	242	79	144	9606.ENSP00000222693,9606.ENSP00000258149,9606.ENSP00000332973,9606.ENSP00000410294	CAV2,MDM2,SMAD3,FGFR2
hsa04371	Apelin signaling pathway	3	133	92	191	9606.ENSP00000227507,9606.ENSP00000315299,9606.ENSP00000332973	CCND1,CALML3,SMAD3
hsa04550	Signaling pathways regulating pluripotency of stem cells	3	138	9	206	9606.ENSP00000258411,9606.ENSP00000332973,9606.ENSP00000410294	WNT10A,SMAD3,FGFR2
hsa05161	Hepatitis B	3	142	89	218	9606.ENSP00000227507,9606.ENSP00000332973,9606.ENSP00000363089	CCND1,SMAD3,TLR4
hsa05224	Breast cancer	3	147	88	234	9606.ENSP00000227507,9606.ENSP00000258411,9606.ENSP00000361943	CCND1,WNT10A,HEYL
hsa04921	Oxytocin signaling pathway	3	149	87	238	9606.ENSP00000227507,9606.ENSP00000262138,9606.ENSP00000315299	CCND1,CACNG4,CALML3
hsa04217	Necroptosis	3	155	85	260	9606.ENSP00000276431,9606.ENSP00000363089,9606.ENSP00000481570	TNFRSF10B,TLR4,TNFAIP3
hsa05152	Tuberculosis	3	172	81	336	9606.ENSP00000227752,9606.ENSP00000315299,9606.ENSP00000363089	IL10RA,CALML3,TLR4
hsa05321	Inflammatory bowel disease (IBD)	2	62	108	362	9606.ENSP00000332973,9606.ENSP00000363089	SMAD3,TLR4
hsa05203	Viral carcinogenesis	3	183	78	380	9606.ENSP00000227507,9606.ENSP00000258149,9606.ENSP00000261254	CCND1,MDM2,CCND2
hsa04917	Prolactin signaling pathway	2	69	103	425	9606.ENSP00000227507,9606.ENSP00000261254	CCND1,CCND2
hsa05212	Pancreatic cancer	2	74	10	475	9606.ENSP00000227507,9606.ENSP00000332973	CCND1,SMAD3

## Sheet: sheet 1
Table SIII. Enriched pathways of deregulated genes targeted by tomentosin in RPMI-8226 cell line.
A, Upregulated genes
Term ID	Term description	Observed gene count	Background gene count	Strength	False discovery rate	Matching proteins to the KEGG pathway (ID)	Symbol name of observed genes
hsa04141	Protein processing in endoplasmic reticulum	9	161	1.19	1.89e-06	9606,ENSP00000254322,9606,ENSP00000296464,9606,ENSP00000318687,9606,ENSP00000336790,9606,ENSP00000338019,9606,ENSP00000364802,9606,ENSP00000369127,9606,ENSP00000432083,9606,ENSP00000448665	DNAJB1,HSPA4L,HSPH1,ATF4,DNAJB2,HSPA1A,DNAJA1,HSPA8,DDIT3
hsa04010	MAPK signaling pathway	10	293	0.97	1.21e-05	9606,ENSP00000248553,9606,ENSP00000252506,9606,ENSP00000333685,9606,ENSP00000336790,9606,ENSP00000359719,9606,ENSP00000364802,9606,ENSP00000424183,9606,ENSP00000432083,9606,ENSP00000448665,9606,ENSP00000483825	HSPB1,GADD45G,MAPK11,ATF4,PRKACB,HSPA1A,LAMTOR3,HSPA8,DDIT3,IKBKG
hsa04216	Ferroptosis	5	40	1.54	3.55e-05	9606,ENSP00000216117,9606,ENSP00000273550,9606,ENSP00000280612,9606,ENSP00000359258,9606,ENSP00000367123	HMOX1,FTH1,SLC7A11,GCLM,SLC3A2
hsa04210	Apoptosis	7	135	1.16	3.67e-05	9606,ENSP00000252506,9606,ENSP00000307786,9606,ENSP00000326119,9606,ENSP00000336790,9606,ENSP00000366237,9606,ENSP00000448665,9606,ENSP00000483825	GADD45G,CYCS,PMAIP1,ATF4,DFFA,DDIT3,IKBKG
hsa05145	Toxoplasmosis	6	109	1.18	0.00014	9606,ENSP00000284818,9606,ENSP00000307786,9606,ENSP00000333685,9606,ENSP00000364802,9606,ENSP00000432083,9606,ENSP00000483825	LY96,CYCS,MAPK11,HSPA1A,HSPA8,IKBKG
hsa04620	Toll-like receptor signaling pathway	5	102	1.13	0.0013	9606,ENSP00000284818,9606,ENSP00000333685,9606,ENSP00000378517,9606,ENSP00000389600,9606,ENSP00000483825	LY96,MAPK11,SPP1,TLR6,IKBKG
hsa04213	Longevity regulating pathway - multiple species	4	61	1.26	0.0022	9606,ENSP00000359719,9606,ENSP00000364802,9606,ENSP00000375711,9606,ENSP00000432083	PRKACB,HSPA1A,AKT1S1,HSPA8
hsa05169	Epstein-Barr virus infection	6	194	0.93	0.0022	9606,ENSP00000248553,9606,ENSP00000333685,9606,ENSP00000359719,9606,ENSP00000364802,9606,ENSP00000432083,9606,ENSP00000483825	HSPB1,MAPK11,PRKACB,HSPA1A,HSPA8,IKBKG
hsa05200	Pathways in cancer	9	515	0.68	0.0022	9606,ENSP00000216117,9606,ENSP00000252506,9606,ENSP00000256996,9606,ENSP00000307786,9606,ENSP00000319788,9606,ENSP00000326119,9606,ENSP00000359719,9606,ENSP00000434516,9606,ENSP00000483825	HMOX1,GADD45G,DDB2,CYCS,NQO1,PMAIP1,PRKACB,TXNRD1,IKBKG
hsa04115	p53 signaling pathway	4	68	1.21	0.0024	9606,ENSP00000252506,9606,ENSP00000256996,9606,ENSP00000307786,9606,ENSP00000326119	GADD45G,DDB2,CYCS,PMAIP1
hsa05418	Fluid shear stress and atherosclerosis	5	133	1.02	0.0024	9606,ENSP00000216117,9606,ENSP00000319788,9606,ENSP00000333685,9606,ENSP00000374455,9606,ENSP00000483825	HMOX1,NQO1,MAPK11,SQSTM1,IKBKG
hsa04211	Longevity regulating pathway	4	88	1.1	0.0044	9606,ENSP00000336790,9606,ENSP00000359719,9606,ENSP00000375711,9606,ENSP00000432412	ATF4,PRKACB,AKT1S1,ATG13
hsa04218	Cellular senescence	5	156	0.95	0.0044	9606,ENSP00000252506,9606,ENSP00000303754,9606,ENSP00000325863,9606,ENSP00000333685,9606,ENSP00000374455	GADD45G,PPID,MRE11A,MAPK11,SQSTM1
hsa04657	IL-17 signaling pathway	4	92	1.08	0.0044	9606,ENSP00000296871,9606,ENSP00000310170,9606,ENSP00000333685,9606,ENSP00000483825	CSF2,FOSL1,MAPK11,IKBKG
hsa05164	Influenza A	5	168	0.91	0.0044	9606,ENSP00000254322,9606,ENSP00000307786,9606,ENSP00000333685,9606,ENSP00000364802,9606,ENSP00000432083	DNAJB1,CYCS,MAPK11,HSPA1A,HSPA8
hsa05166	HTLV-I infection	6	250	0.82	0.0044	9606,ENSP00000239938,9606,ENSP00000296871,9606,ENSP00000310170,9606,ENSP00000336790,9606,ENSP00000359719,9606,ENSP00000483825	EGR1,CSF2,FOSL1,ATF4,PRKACB,IKBKG
hsa05202	Transcriptional misregulation in cancer	5	169	0.91	0.0044	9606,ENSP00000252506,9606,ENSP00000256996,9606,ENSP00000296871,9606,ENSP00000306894,9606,ENSP00000448665	GADD45G,DDB2,CSF2,ETV5,DDIT3
hsa05210	Colorectal cancer	4	85	1.11	0.0044	9606,ENSP00000252506,9606,ENSP00000256996,9606,ENSP00000307786,9606,ENSP00000326119	GADD45G,DDB2,CYCS,PMAIP1
hsa05222	Small cell lung cancer	4	92	1.08	0.0044	9606,ENSP00000252506,9606,ENSP00000256996,9606,ENSP00000307786,9606,ENSP00000483825	GADD45G,DDB2,CYCS,IKBKG
hsa05225	Hepatocellular carcinoma	5	163	0.93	0.0044	9606,ENSP00000216117,9606,ENSP00000252506,9606,ENSP00000256996,9606,ENSP00000319788,9606,ENSP00000434516	HMOX1,GADD45G,DDB2,NQO1,TXNRD1
hsa04668	TNF signaling pathway	4	108	1.01	0.0063	9606,ENSP00000296871,9606,ENSP00000333685,9606,ENSP00000336790,9606,ENSP00000483825	CSF2,MAPK11,ATF4,IKBKG
hsa04140	Autophagy - animal	4	125	0.95	0.0095	9606,ENSP00000307305,9606,ENSP00000359719,9606,ENSP00000375711,9606,ENSP00000432412	DDIT4,PRKACB,AKT1S1,ATG13
hsa04380	Osteoclast differentiation	4	124	0.95	0.0095	9606,ENSP00000310170,9606,ENSP00000333685,9606,ENSP00000374455,9606,ENSP00000483825	FOSL1,MAPK11,SQSTM1,IKBKG
hsa05134	Legionellosis	3	54	1.18	0.0095	9606,ENSP00000307786,9606,ENSP00000364802,9606,ENSP00000432083	CYCS,HSPA1A,HSPA8
hsa04915	Estrogen signaling pathway	4	133	0.92	0.0112	9606,ENSP00000336790,9606,ENSP00000359719,9606,ENSP00000364802,9606,ENSP00000432083	ATF4,PRKACB,HSPA1A,HSPA8
hsa05120	Epithelial cell signaling in Helicobacter pylori infection	3	66	1.1	0.0136	9606,ENSP00000309968,9606,ENSP00000333685,9606,ENSP00000483825	ADAM17,MAPK11,IKBKG
hsa05161	Hepatitis B	4	142	0.89	0.0136	9606,ENSP00000256996,9606,ENSP00000307786,9606,ENSP00000336790,9606,ENSP00000483825	DDB2,CYCS,ATF4,IKBKG
hsa04150	mTOR signaling pathway	4	148	0.87	0.0146	9606,ENSP00000307305,9606,ENSP00000367123,9606,ENSP00000375711,9606,ENSP00000424183	DDIT4,SLC3A2,AKT1S1,LAMTOR3
hsa04918	Thyroid hormone synthesis	3	73	1.05	0.0165	9606,ENSP00000221130,9606,ENSP00000336790,9606,ENSP00000359719	GSR,ATF4,PRKACB
hsa05212	Pancreatic cancer	3	74	1.05	0.0166	9606,ENSP00000252506,9606,ENSP00000256996,9606,ENSP00000483825	GADD45G,DDB2,IKBKG
hsa05220	Chronic myeloid leukemia	3	76	1.04	0.0173	9606,ENSP00000252506,9606,ENSP00000256996,9606,ENSP00000483825	GADD45G,DDB2,IKBKG
hsa04912	GnRH signaling pathway	3	88	0.97	0.0249	9606,ENSP00000333685,9606,ENSP00000336790,9606,ENSP00000359719	MAPK11,ATF4,PRKACB
hsa05167	Kaposi's sarcoma-associated herpesvirus infection	4	183	0.78	0.026	9606,ENSP00000296871,9606,ENSP00000307786,9606,ENSP00000333685,9606,ENSP00000483825	CSF2,CYCS,MAPK11,IKBKG
hsa05203	Viral carcinogenesis	4	183	0.78	0.026	9606,ENSP00000326119,9606,ENSP00000336790,9606,ENSP00000359719,9606,ENSP00000483825	PMAIP1,ATF4,PRKACB,IKBKG
hsa05146	Amoebiasis	3	94	0.94	0.0272	9606,ENSP00000248553,9606,ENSP00000296871,9606,ENSP00000359719	HSPB1,CSF2,PRKACB
hsa05215	Prostate cancer	3	97	0.93	0.0288	9606,ENSP00000306894,9606,ENSP00000336790,9606,ENSP00000483825	ETV5,ATF4,IKBKG
hsa04215	Apoptosis - multiple species	2	31	1.25	0.0303	9606,ENSP00000307786,9606,ENSP00000326119	CYCS,PMAIP1
hsa05142	Chagas disease (American trypanosomiasis)	3	101	0.91	0.0303	9606,ENSP00000333685,9606,ENSP00000389600,9606,ENSP00000483825	MAPK11,TLR6,IKBKG
hsa05020	Prion diseases	2	33	1.22	0.0323	9606,ENSP00000239938,9606,ENSP00000359719	EGR1,PRKACB
hsa05216	Thyroid cancer	2	37	1.17	0.0389	9606,ENSP00000252506,9606,ENSP00000256996	GADD45G,DDB2
B, Downregulated genes
Term ID	Term description	Observed gene count	Background gene count	Strength	False discovery rate	Matching proteins to the KEGG pathway (ID)	Symbol name of observed genes
hsa05200	Pathways in cancer	13	515	0.97	1.56e-07	9606,ENSP00000227507,9606,ENSP00000258149,9606,ENSP00000258411,9606,ENSP00000261254,9606,ENSP00000309572,9606,ENSP00000315299,9606,ENSP00000330382,9606,ENSP00000332973,9606,ENSP00000361943,9606,ENSP00000362608,9606,ENSP00000365692,9606,ENSP00000379140,9606,ENSP00000410294	CCND1,MDM2,WNT10A,CCND2,TERT,CALML3,PDGFB,SMAD3,HEYL,PIM1,PIM2,CXCL12,FGFR2
hsa04060	Cytokine-cytokine receptor interaction	9	263	1.1	3.19e-06	9606,ENSP00000227752,9606,ENSP00000276431,9606,ENSP00000296140,9606,ENSP00000296861,9606,ENSP00000305651,9606,ENSP00000330382,9606,ENSP00000351059,9606,ENSP00000362795,9606,ENSP00000379140	IL10RA,TNFRSF10B,CCR1,TNFRSF21,CXCL10,PDGFB,CX3CR1,CXCR3,CXCL12
hsa05162	Measles	7	133	1.29	4.69e-06	9606,ENSP00000227507,9606,ENSP00000261254,9606,ENSP00000276431,9606,ENSP00000363089,9606,ENSP00000381601,9606,ENSP00000388001,9606,ENSP00000481570	CCND1,CCND2,TNFRSF10B,TLR4,MX1,OAS1,TNFAIP3
hsa05206	MicroRNAs in cancer	7	149	1.24	7.37e-06	9606,ENSP00000227507,9606,ENSP00000258149,9606,ENSP00000261254,9606,ENSP00000330382,9606,ENSP00000346697,9606,ENSP00000356113,9606,ENSP00000362608	CCND1,MDM2,CCND2,PDGFB,BMF,SLC45A3,PIM1
hsa05164	Influenza A	7	168	1.19	1.29e-05	9606,ENSP00000276431,9606,ENSP00000305651,9606,ENSP00000363089,9606,ENSP00000381588,9606,ENSP00000381601,9606,ENSP00000388001,9606,ENSP00000468348	TNFRSF10B,CXCL10,TLR4,TMPRSS2,MX1,OAS1,MAP2K6
hsa04218	Cellular senescence	6	156	1.15	0.00012	9606,ENSP00000227507,9606,ENSP00000258149,9606,ENSP00000261254,9606,ENSP00000315299,9606,ENSP00000332973,9606,ENSP00000468348	CCND1,MDM2,CCND2,CALML3,SMAD3,MAP2K6
hsa05202	Transcriptional misregulation in cancer	6	169	1.12	0.00016	9606,ENSP00000258149,9606,ENSP00000261254,9606,ENSP00000356113,9606,ENSP00000360493,9606,ENSP00000362361,9606,ENSP00000381588	MDM2,CCND2,SLC45A3,RUNX2,CDK9,TMPRSS2
hsa05215	Prostate cancer	5	97	1.28	0.00016	9606,ENSP00000227507,9606,ENSP00000258149,9606,ENSP00000330382,9606,ENSP00000381588,9606,ENSP00000410294	CCND1,MDM2,PDGFB,TMPRSS2,FGFR2
hsa04062	Chemokine signaling pathway	6	181	1.09	0.00018	9606,ENSP00000296140,9606,ENSP00000305651,9606,ENSP00000351059,9606,ENSP00000362795,9606,ENSP00000378217,9606,ENSP00000379140	CCR1,CXCL10,CX3CR1,CXCR3,PRKCD,CXCL12
hsa04110	Cell cycle	5	123	1.18	0.00036	9606,ENSP00000227507,9606,ENSP00000258149,9606,ENSP00000261254,9606,ENSP00000307288,9606,ENSP00000332973	CCND1,MDM2,CCND2,MCM7,SMAD3
hsa05165	Human papillomavirus infection	7	317	0.91	0.00036	9606,ENSP00000227507,9606,ENSP00000258149,9606,ENSP00000258411,9606,ENSP00000261254,9606,ENSP00000309572,9606,ENSP00000361943,9606,ENSP00000381601	CCND1,MDM2,WNT10A,CCND2,TERT,HEYL,MX1
hsa04115	p53 signaling pathway	4	68	1.34	0.00053	9606,ENSP00000227507,9606,ENSP00000258149,9606,ENSP00000261254,9606,ENSP00000276431	CCND1,MDM2,CCND2,TNFRSF10B
hsa04151	PI3K-Akt signaling pathway	7	348	0.87	0.00053	9606,ENSP00000227507,9606,ENSP00000258149,9606,ENSP00000261254,9606,ENSP00000330382,9606,ENSP00000351209,9606,ENSP00000363089,9606,ENSP00000410294	CCND1,MDM2,CCND2,PDGFB,EPHA2,TLR4,FGFR2
hsa05214	Glioma	4	68	1.34	0.00053	9606,ENSP00000227507,9606,ENSP00000258149,9606,ENSP00000315299,9606,ENSP00000330382	CCND1,MDM2,CALML3,PDGFB
hsa05226	Gastric cancer	5	147	1.1	0.00055	9606,ENSP00000227507,9606,ENSP00000258411,9606,ENSP00000309572,9606,ENSP00000332973,9606,ENSP00000410294	CCND1,WNT10A,TERT,SMAD3,FGFR2
hsa04390	Hippo signaling pathway	5	152	1.08	0.00059	9606,ENSP00000227507,9606,ENSP00000258411,9606,ENSP00000261254,9606,ENSP00000262158,9606,ENSP00000332973	CCND1,WNT10A,CCND2,SMAD7,SMAD3
hsa05166	HTLV-I infection	6	250	0.95	0.00059	9606,ENSP00000227507,9606,ENSP00000258411,9606,ENSP00000261254,9606,ENSP00000309572,9606,ENSP00000330382,9606,ENSP00000332973	CCND1,WNT10A,CCND2,TERT,PDGFB,SMAD3
hsa04630	Jak-STAT signaling pathway	5	160	1.06	0.00067	9606,ENSP00000227507,9606,ENSP00000227752,9606,ENSP00000261254,9606,ENSP00000330382,9606,ENSP00000362608	CCND1,IL10RA,CCND2,PDGFB,PIM1
hsa04621	NOD-like receptor signaling pathway	5	166	1.05	0.00076	9606,ENSP00000363089,9606,ENSP00000378217,9606,ENSP00000388001,9606,ENSP00000462521,9606,ENSP00000481570	TLR4,PRKCD,OAS1,TXNIP,TNFAIP3
hsa04010	MAPK signaling pathway	6	293	0.88	0.0011	9606,ENSP00000262138,9606,ENSP00000330382,9606,ENSP00000351209,9606,ENSP00000405963,9606,ENSP00000410294,9606,ENSP00000468348	CACNG4,PDGFB,EPHA2,RASGRF1,FGFR2,MAP2K6
hsa04933	AGE-RAGE signaling pathway in diabetic complications	4	98	1.18	0.0011	9606,ENSP00000227507,9606,ENSP00000332973,9606,ENSP00000362608,9606,ENSP00000378217	CCND1,SMAD3,PIM1,PRKCD
hsa05167	Kaposi's sarcoma-associated herpesvirus infection	5	183	1	0.0011	9606,ENSP00000227507,9606,ENSP00000296140,9606,ENSP00000315299,9606,ENSP00000330382,9606,ENSP00000468348	CCND1,CCR1,CALML3,PDGFB,MAP2K6
hsa04510	Focal adhesion	5	197	0.97	0.0013	9606,ENSP00000222693,9606,ENSP00000227507,9606,ENSP00000261254,9606,ENSP00000330382,9606,ENSP00000405963	CAV2,CCND1,CCND2,PDGFB,RASGRF1
hsa05205	Proteoglycans in cancer	5	195	0.98	0.0013	9606,ENSP00000222693,9606,ENSP00000227507,9606,ENSP00000258149,9606,ENSP00000258411,9606,ENSP00000363089	CAV2,CCND1,MDM2,WNT10A,TLR4
hsa05219	Bladder cancer	3	41	1.43	0.0013	9606,ENSP00000227507,9606,ENSP00000258149,9606,ENSP00000379038	CCND1,MDM2,TYMP
hsa04015	Rap1 signaling pathway	5	203	0.96	0.0014	9606,ENSP00000315299,9606,ENSP00000330382,9606,ENSP00000351209,9606,ENSP00000410294,9606,ENSP00000468348	CALML3,PDGFB,EPHA2,FGFR2,MAP2K6
hsa04340	Hedgehog signaling pathway	3	46	1.38	0.0017	9606,ENSP00000227507,9606,ENSP00000261254,9606,ENSP00000385808	CCND1,CCND2,KIF3A
hsa04014	Ras signaling pathway	5	228	0.91	0.0022	9606,ENSP00000315299,9606,ENSP00000330382,9606,ENSP00000351209,9606,ENSP00000405963,9606,ENSP00000410294	CALML3,PDGFB,EPHA2,RASGRF1,FGFR2
hsa04068	FoxO signaling pathway	4	130	1.06	0.0024	9606,ENSP00000227507,9606,ENSP00000258149,9606,ENSP00000261254,9606,ENSP00000332973	CCND1,MDM2,CCND2,SMAD3
hsa05418	Fluid shear stress and atherosclerosis	4	133	1.05	0.0025	9606,ENSP00000222693,9606,ENSP00000315299,9606,ENSP00000330382,9606,ENSP00000468348	CAV2,CALML3,PDGFB,MAP2K6
hsa04310	Wnt signaling pathway	4	143	1.01	0.0032	9606,ENSP00000227507,9606,ENSP00000258411,9606,ENSP00000261254,9606,ENSP00000332973	CCND1,WNT10A,CCND2,SMAD3
hsa05221	Acute myeloid leukemia	3	66	1.22	0.004	9606,ENSP00000227507,9606,ENSP00000362608,9606,ENSP00000365692	CCND1,PIM1,PIM2
hsa05218	Melanoma	3	72	1.19	0.0048	9606,ENSP00000227507,9606,ENSP00000258149,9606,ENSP00000330382	CCND1,MDM2,PDGFB
hsa05225	Hepatocellular carcinoma	4	163	0.96	0.0048	9606,ENSP00000227507,9606,ENSP00000258411,9606,ENSP00000309572,9606,ENSP00000332973	CCND1,WNT10A,TERT,SMAD3
hsa05133	Pertussis	3	74	1.18	0.005	9606,ENSP00000268638,9606,ENSP00000315299,9606,ENSP00000363089	IRF8,CALML3,TLR4
hsa05220	Chronic myeloid leukemia	3	76	1.16	0.0052	9606,ENSP00000227507,9606,ENSP00000258149,9606,ENSP00000332973	CCND1,MDM2,SMAD3
hsa04912	GnRH signaling pathway	3	88	1.1	0.0076	9606,ENSP00000315299,9606,ENSP00000378217,9606,ENSP00000468348	CALML3,PRKCD,MAP2K6
hsa05169	Epstein-Barr virus infection	4	194	0.88	0.0078	9606,ENSP00000227752,9606,ENSP00000258149,9606,ENSP00000468348,9606,ENSP00000481570	IL10RA,MDM2,MAP2K6,TNFAIP3
hsa04064	NF-kappa B signaling pathway	3	93	1.08	0.0082	9606,ENSP00000363089,9606,ENSP00000379140,9606,ENSP00000481570	TLR4,CXCL12,TNFAIP3
hsa04750	Inflammatory mediator regulation of TRP channels	3	92	1.08	0.0082	9606,ENSP00000315299,9606,ENSP00000378217,9606,ENSP00000468348	CALML3,PRKCD,MAP2K6
hsa01522	Endocrine resistance	3	95	1.07	0.0085	9606,ENSP00000227507,9606,ENSP00000258149,9606,ENSP00000353820	CCND1,MDM2,CYP2D6
hsa04620	Toll-like receptor signaling pathway	3	102	1.04	0.0101	9606,ENSP00000305651,9606,ENSP00000363089,9606,ENSP00000468348	CXCL10,TLR4,MAP2K6
hsa04668	TNF signaling pathway	3	108	1.01	0.0116	9606,ENSP00000305651,9606,ENSP00000468348,9606,ENSP00000481570	CXCL10,MAP2K6,TNFAIP3
hsa05145	Toxoplasmosis	3	109	1.01	0.0116	9606,ENSP00000227752,9606,ENSP00000363089,9606,ENSP00000468348	IL10RA,TLR4,MAP2K6
hsa04144	Endocytosis	4	242	0.79	0.0144	9606,ENSP00000222693,9606,ENSP00000258149,9606,ENSP00000332973,9606,ENSP00000410294	CAV2,MDM2,SMAD3,FGFR2
hsa04371	Apelin signaling pathway	3	133	0.92	0.0191	9606,ENSP00000227507,9606,ENSP00000315299,9606,ENSP00000332973	CCND1,CALML3,SMAD3
hsa04550	Signaling pathways regulating pluripotency of stem cells	3	138	0.9	0.0206	9606,ENSP00000258411,9606,ENSP00000332973,9606,ENSP00000410294	WNT10A,SMAD3,FGFR2
hsa05161	Hepatitis B	3	142	0.89	0.0218	9606,ENSP00000227507,9606,ENSP00000332973,9606,ENSP00000363089	CCND1,SMAD3,TLR4
hsa05224	Breast cancer	3	147	0.88	0.0234	9606,ENSP00000227507,9606,ENSP00000258411,9606,ENSP00000361943	CCND1,WNT10A,HEYL
hsa04921	Oxytocin signaling pathway	3	149	0.87	0.0238	9606,ENSP00000227507,9606,ENSP00000262138,9606,ENSP00000315299	CCND1,CACNG4,CALML3
hsa04217	Necroptosis	3	155	0.85	0.026	9606,ENSP00000276431,9606,ENSP00000363089,9606,ENSP00000481570	TNFRSF10B,TLR4,TNFAIP3
hsa05152	Tuberculosis	3	172	0.81	0.0336	9606,ENSP00000227752,9606,ENSP00000315299,9606,ENSP00000363089	IL10RA,CALML3,TLR4
hsa05321	Inflammatory bowel disease (IBD)	2	62	1.08	0.0362	9606,ENSP00000332973,9606,ENSP00000363089	SMAD3,TLR4
hsa05203	Viral carcinogenesis	3	183	0.78	0.038	9606,ENSP00000227507,9606,ENSP00000258149,9606,ENSP00000261254	CCND1,MDM2,CCND2
hsa04917	Prolactin signaling pathway	2	69	1.03	0.0425	9606,ENSP00000227507,9606,ENSP00000261254	CCND1,CCND2
hsa05212	Pancreatic cancer	2	74	1	0.0475	9606,ENSP00000227507,9606,ENSP00000332973	CCND1,SMAD3
KEGG, Kyoto Encyclopedia of Genes and Genomes.
